# Supplementary material
Source: MDPI journal article supplement (https://www.mdpi.com/2297-8739/9/7/166)
Supplement: s1 [file s1]

## SUPPLEMENTARY DATA

**Table S1:** Sampling procedure of the influent, effluent, lake water and tap water from areas in Daspoort wastewater treatment plant, Sterkfontein lake and tap water in Doornfontein, South Africa.

|                       | <b>Influent</b>                                                   | <b>Effluent</b>                                                   | <b>Lake water</b>                                                 | <b>Tap water</b>                                                                |
|-----------------------|-------------------------------------------------------------------|-------------------------------------------------------------------|-------------------------------------------------------------------|---------------------------------------------------------------------------------|
| <b>Volume (L)</b>     | 5                                                                 | 5                                                                 | 5                                                                 | 3                                                                               |
| <b>Location</b>       | Daspoort wastewater treatment plant, Pretoria                     | Daspoort wastewater treatment plant                               | Sterkfontein Lake, Johannesburg                                   | Doornfontein, Johannesburg                                                      |
| <b>Sampling point</b> | primary influent                                                  | effluent point after treatment                                    | stream leading out of the lake                                    | from the tap after the water flows for 1 min                                    |
| <b>Sampling dates</b> | March 2021 (summer), June 2021 (winter) and October 2021 (spring) | March 2021 (summer), June 2021 (winter) and October 2021 (spring) | March 2021 (summer), June 2021 (winter) and October 2021 (spring) | March 2021 (summer), June 2021 (winter) and October 2021 (spring)<br>April 2022 |
